# Supplementary material
Source: PubMed Central journal article supplement (PMC549018)

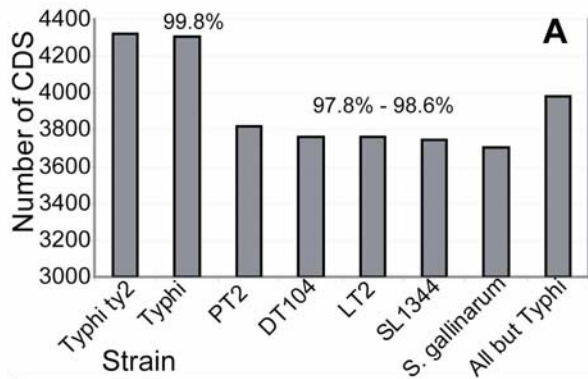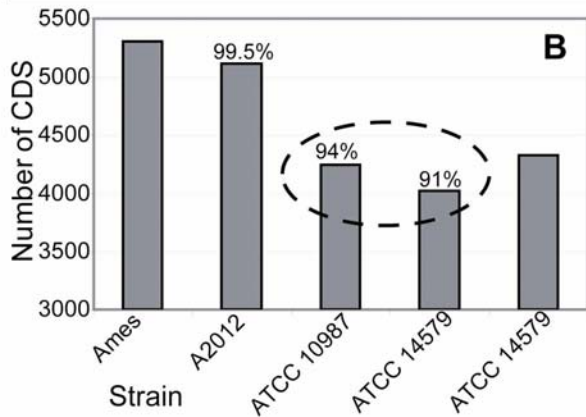

Supplement: pnas_102_7_2567__2.pdf [file pnas_102_7_2567__2.pdf]
